# Supplementary material for: Structural and spectroscopic characterization of potassium fluoroborohydrides
Source: Royal Society of Chemistry journal article supplement (doi:10.1039/c3cp52070f), 2013-01-01
Supplement: c3cp52070f.pdf [file c3cp52070f.pdf]

**Supplementary Information for**

**Structural and spectroscopic characterization  
of potassium fluoroborohydrides**

Richard H. Heyn,<sup>\*a</sup> Ivan Saldan,<sup>b,#</sup> Magnus H. Sørby,<sup>b</sup> Christoph Frommen,<sup>b</sup> Bjørnar Arstad,<sup>a</sup>  
Aud M. Bougza,<sup>a</sup> Helmer Fjellvåg,<sup>c</sup> and Bjørn C. Hauback<sup>b</sup>

<sup>a</sup> SINTEF Materials and Chemistry, P. O. Box 124 Blindern, 0314 Oslo, Norway. Fax: +47 7359 7043; Tel: +47 9824 3927; E-mail: rhh@sintef.no

<sup>b</sup> Institute for Energy Technology (IFE), P. O. Box 40, 2027 Kjeller, Norway.

<sup>c</sup> Department of Chemistry, University of Oslo, P. O. Box 1033 Blindern, 0315 Oslo, Norway.

<sup>#</sup> Current address: Department of Physical and Colloid Chemistry, Chemical Faculty, Ivan Franko National University of Lviv, 6 Kyryla and Mefodiya Str., UA-79005, Lviv, Ukraine

## Experimental details

**Ball milling.** Commercial  $\text{KBH}_4$  ( $\geq 98\%$ , Sigma Aldrich) and  $\text{KBF}_4$  ( $\geq 99.99\%$ , Sigma Aldrich) powders were used to prepare mixtures in molar ratios 3:1 and 1:1. The mixtures were ground in a mortar and pestle for some minutes and after that milled in Spex 8000 M Mixer Mill for 10h. Stainless steel balls 10 mm in size with 40:1 ratio balls to powders were used. All handling and preparation of the mixtures took place in a glove box with continuously purified argon atmosphere where oxygen and moisture values were less than 1 ppm.

**Powder X-ray diffraction.** PXD was performed with Bruker AXS D8 Advance using  $\text{Cu K}\alpha$  radiation ( $\lambda_1 = 1.54056 \text{ \AA}$ ,  $\lambda_2 = 1.54444 \text{ \AA}$ ). The samples were encapsulated airtight in 0.8 mm glass capillaries in the glove box. During the capillary preparation silicon powder ( $\geq 99.999\%$ ; 1-5 micron; ABCR) was added to the sample as an internal standard. A LynxEye<sup>TM</sup> strip-detector was used for data acquisition with step size of  $0.02^\circ$  in the  $2\Theta$  ranges of  $20\text{--}65^\circ$  (sample **1**) and  $20\text{--}90^\circ$  (sample **2**) at ambient temperature. The PXD data were analyzed according to the Rietveld method using the FullProf Suite software package. A pseudo-Voigt function with a simple mixing parameter was used to describe the Bragg peak profiles. The backgrounds were interpolated between manually selected background points (21 points for the 3:1 sample and 14 points for the 1:1 sample). Corrections for instrumental zeropoint offset and sample offset was determined from the positions of the silicon peaks.

**Solid state NMR experiments.** The experiments were performed at 11.7 T on a Bruker Avance III spectrometer using a 4.0 mm double resonance MAS probehead at room temperature. The MAS rate was 13 kHz for all experiments.

The  $^1\text{H}$  spectra were obtained using 100 scans with a 10 second recycle delay. The  $^{11}\text{B}$  spectra were obtained using 100 scans, 1 second recycle delay, and 1 microsecond long pulses, and the  $^{19}\text{F}$  spectra were obtained using 100 scans, and 5 second recycle delay. The  $^{11}\text{B}$  3MQMAS experiment was carried out with a three pulse z-filtering sequence [1]. The spectra were acquired with 384 scans for each of the 200 experiments in the indirect dimension. The recycle delay was 1 s.  $^1\text{H}\text{--}^{11}\text{B}$  CP,  $^{19}\text{F}\text{--}^{11}\text{B}$  cross polarization (CP) spectra were acquired with 4000 scan, a recycle delay of 5 seconds and Hartmann-Hahn contact times of 500, 1500 and 200 microseconds. The  $\alpha$  parameter is likely much less than 1 due to low rf-power levels used, the fast MAS rate and the likely low quadrupolar coupling strength of B in these samples.

The  $^1\text{H}$  chemical shift is externally referred to TMS while pure  $\text{KBH}_4$  and  $\text{KBF}_4$  have been used for comparisons with synthesized materials.

All curve fittings were done using the MestReNova 8.1.1-11591 software with a mix of gaussian and lorentzian shapes.

**Thermogravimetric experiments (TG).** TG data was obtained with a STA449 F1 Jupiter instrument from NETZSCH. Samples of about 3 mg were measured in  $\text{Al}_2\text{O}_3$  sample pans covered with pierced lids made of the same material. The experiments were conducted under flowing argon gas (50 ml/min) and with a heating rate of 2  $^\circ\text{C}/\text{min}$ . The raw data was background corrected for sample holder effects by means of a correction file obtained under identical conditions.

**Wet chemical synthesis.** All operations were carried out in an Ar-filled glove box or with standard Schlenk techniques under Ar. All solvents were dried with either Na or  $\text{CaH}_2$  and distilled. Potassium fluoride (Sigma-Aldrich, 0.43 g, 7.4 mmol) was ground to a powder with a mortar and pestle and placed in a 100 ml Schlenk flask. Dimethoxyethane (ca. 40 ml) was added via cannula and  $\text{BH}_3\cdot\text{SMe}_2$  (Sigma-Aldrich, 1.0 ml, 10.5 mmol) was added via syringe. The resulting white slurry was then refluxed for 15 h. After cooling, the resulting white precipitate was isolated by filtration, washed with  $\text{Et}_2\text{O}$  (2 x 20 ml), and dried under vacuum. Yield: 0.45 g. The solid state  $^{11}\text{B}$  NMR spectrum showed two resonances consistent with  $\text{BF}_4^-$  and  $\text{BH}_4^-$  tetrahedra. The solid state  $^{19}\text{F}$  NMR spectrum showed several resonances; only that for KF (-133.0 ppm) and  $\text{KBF}_4$  (-152.5 ppm) could be assigned. The PXRD data shows phases for KF,  $\text{KBH}_4$ , and  $\text{KBF}_4$ , in addition to reflections for other, unknown phases.

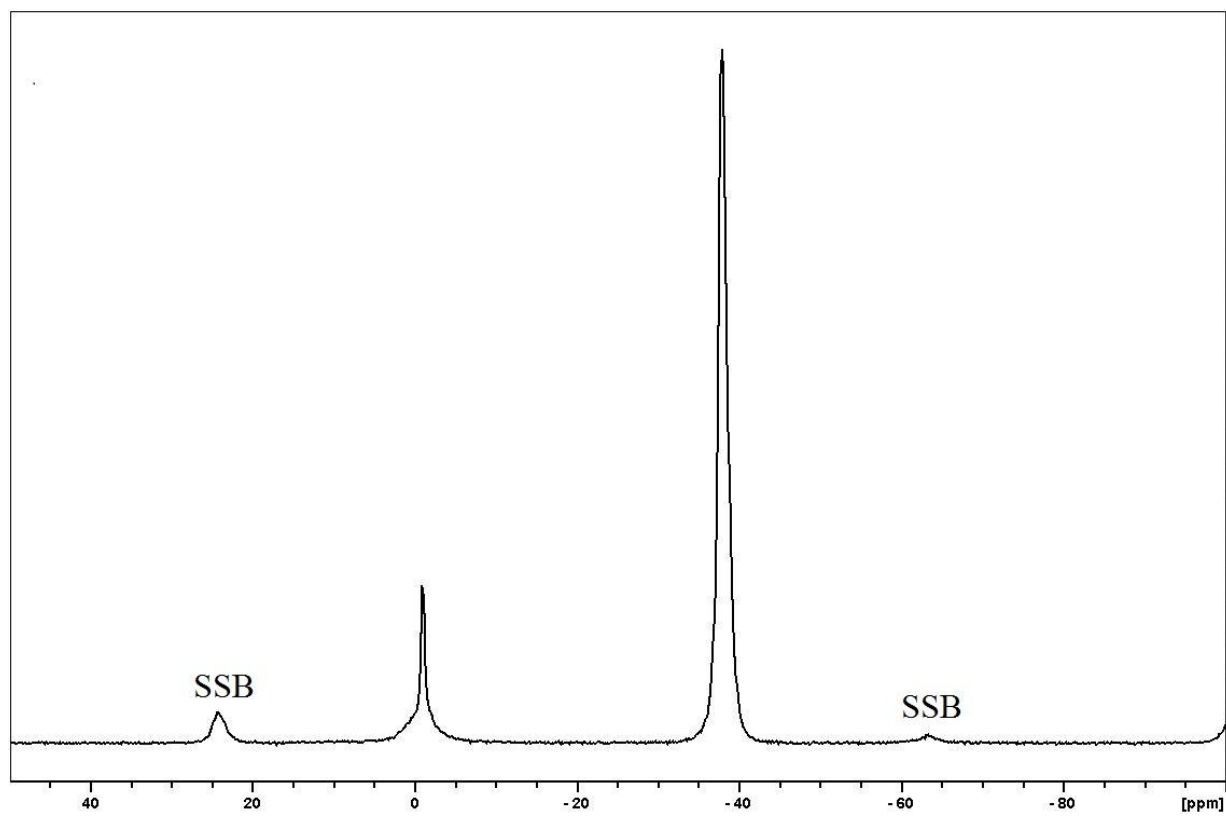

**Figure 1S.** Solid state  $^{11}\text{B}$  NMR spectrum of **3**.

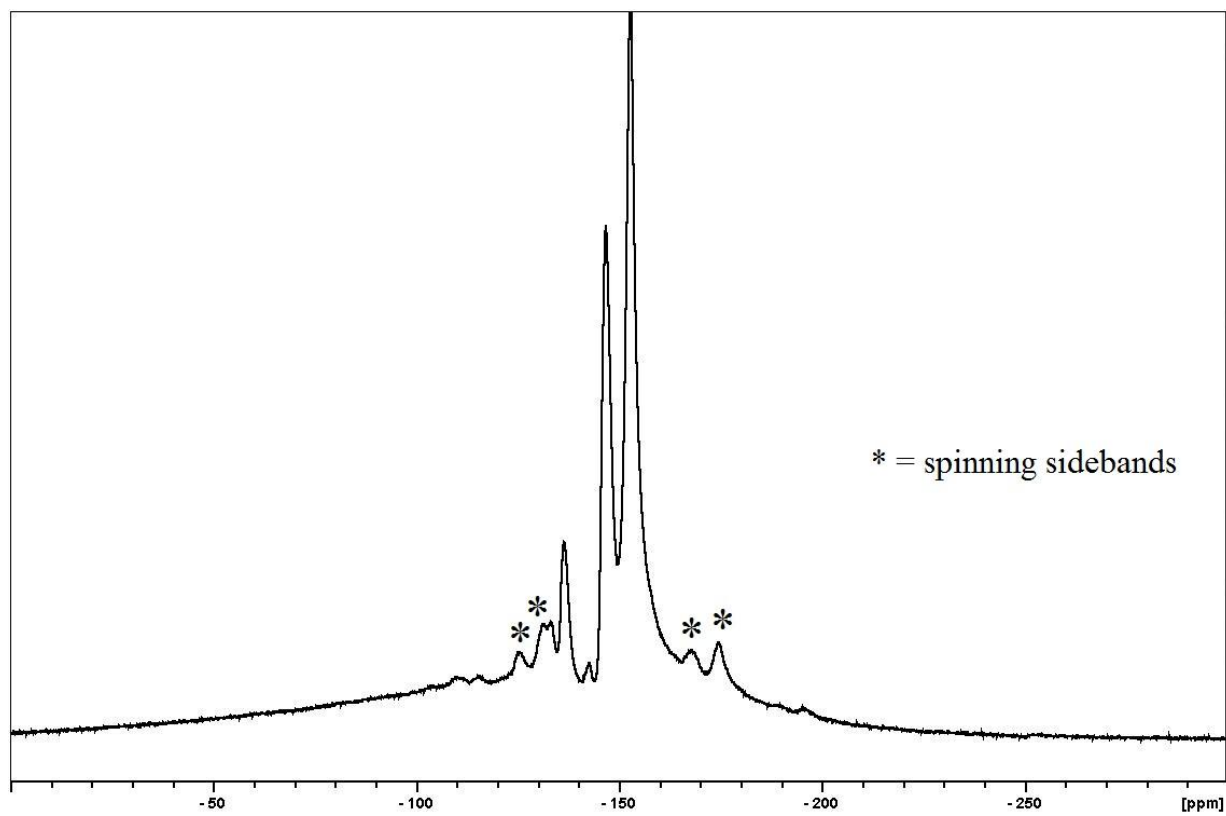

**Figure 2S.** Solid state  $^{19}\text{F}$  NMR of **3**.

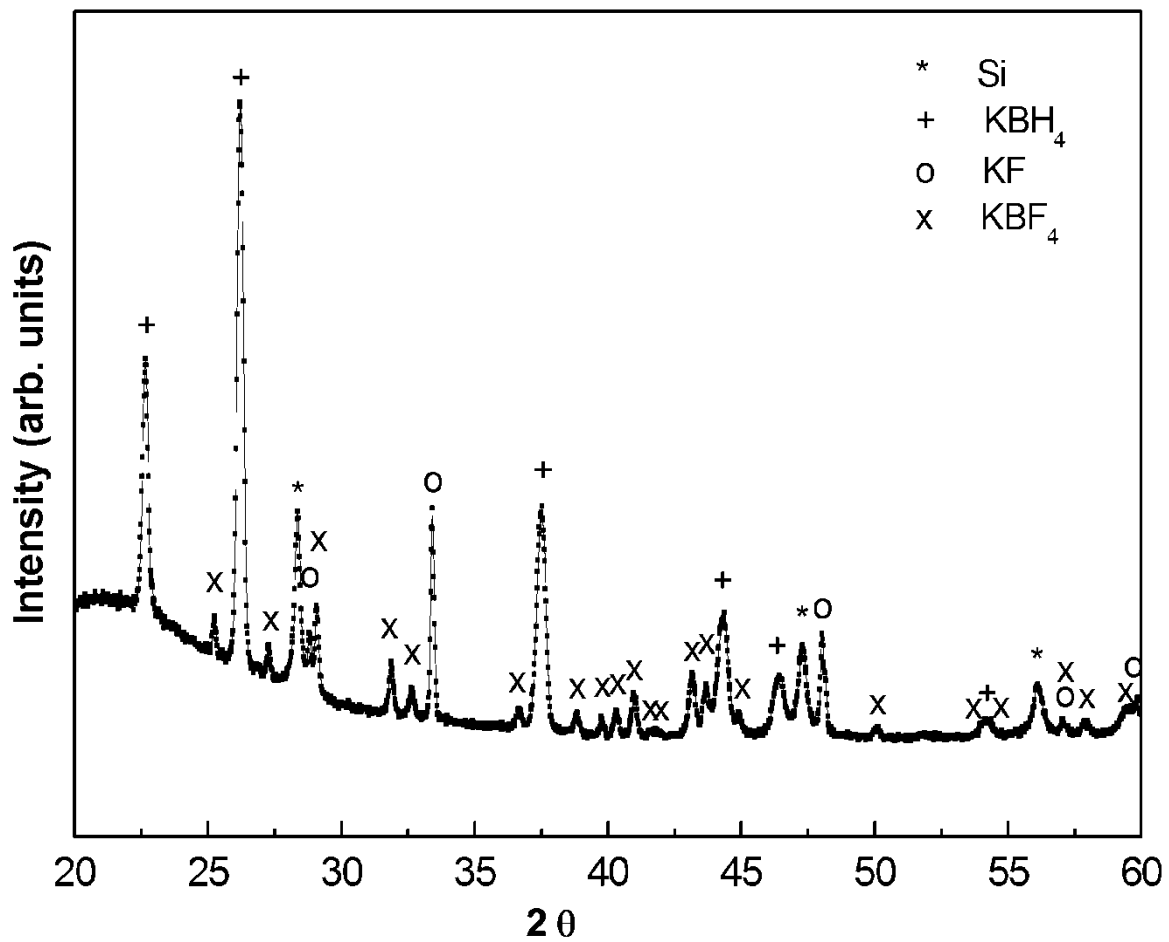

Figure 3S. PXRD of 3.

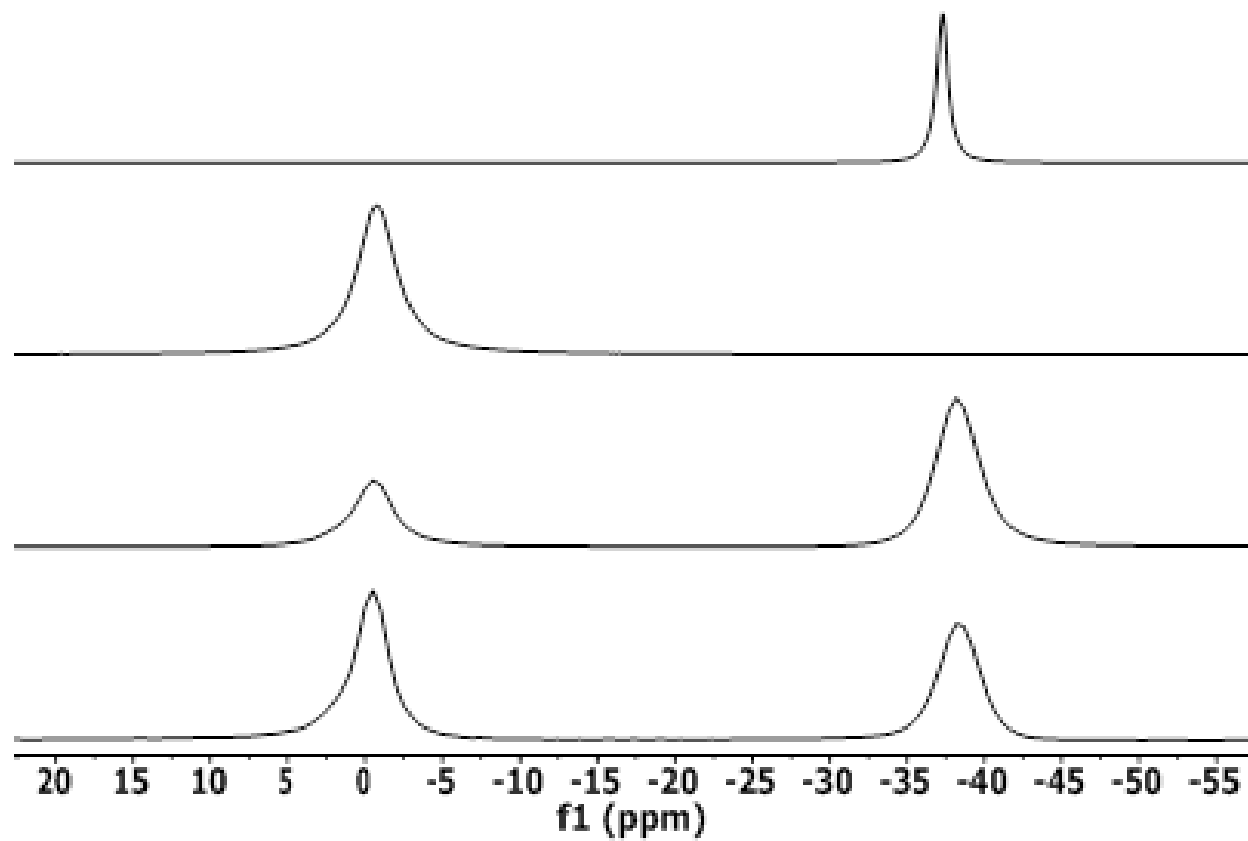

**Figure 4S.** Enlarged view of Figure 3 of the  $^{11}\text{B}$  NMR spectra of  $\text{KBH}_4$ ,  $\text{KBF}_4$ , **1**, and **2** (top to bottom).

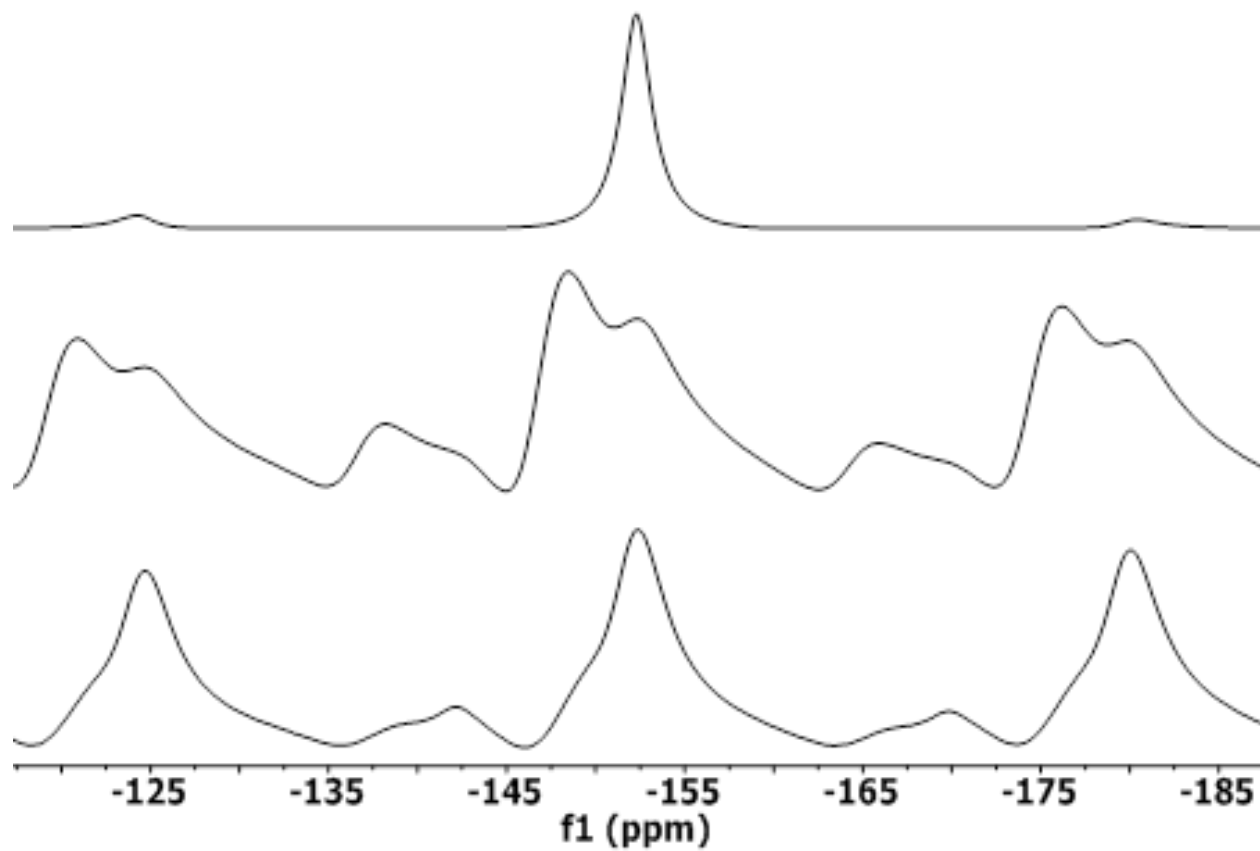

**Figure 5S.** Enlarged view of Figure 6 of the  $^{19}\text{F}$  NMR spectra for  $\text{KBF}_4$ , **1**, and **2** (top to bottom).



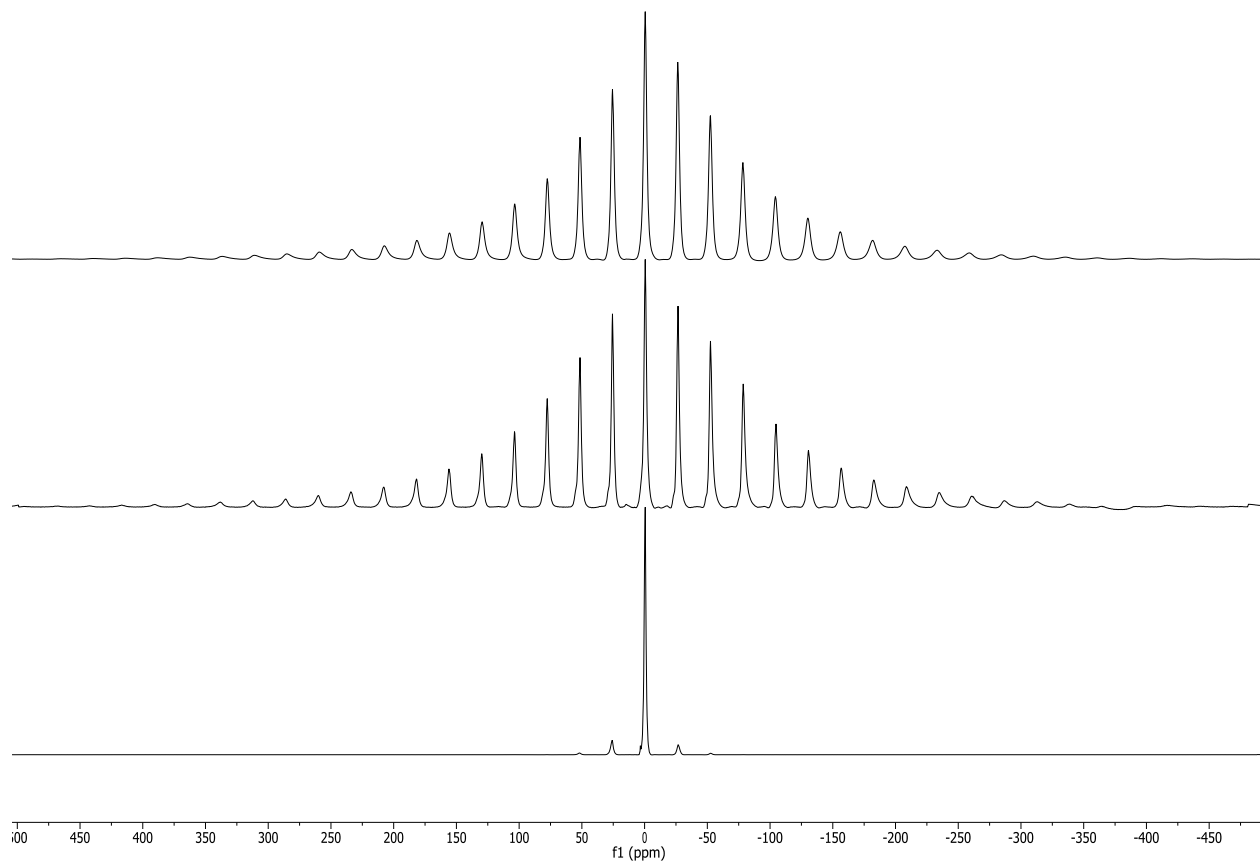

**Figure 6S.**  $^1\text{H}$  NMR spectra for **1**, **2**, and **3** (top to bottom).

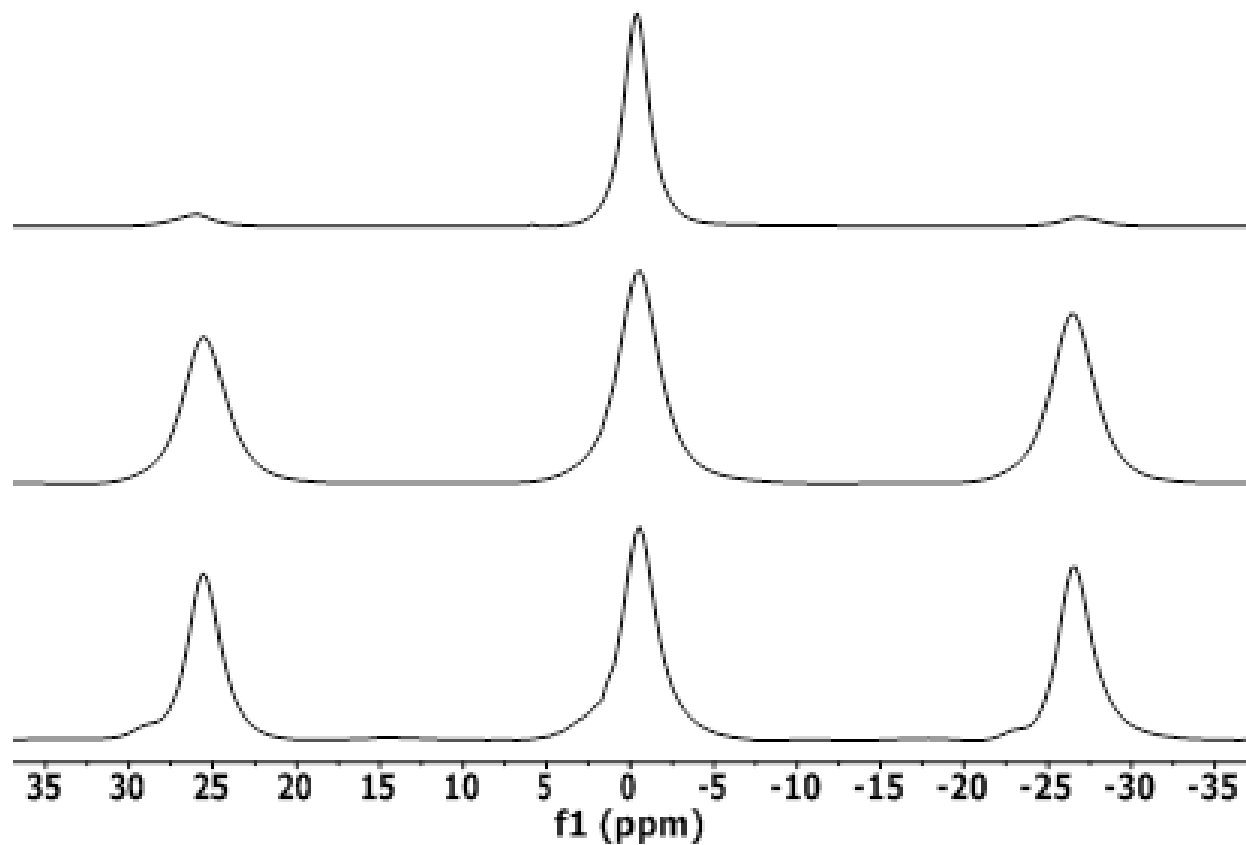

**Figure7S.** Enlarged view of the  $^1\text{H}$  NMR spectra of  $\text{KBH}_4$ , **1**, and **2** (top to bottom).

#### Footnotes

1. J. P. Amoureux, C. Fernandez, S. Steuernagel, *J. Magn. Res. Series A*, 1996, **123**, 116-118.
